# Supplementary material
Source: ML conference proceedings conference paper supplement (https://openreview.net/forum?id=75CcopPxIr)

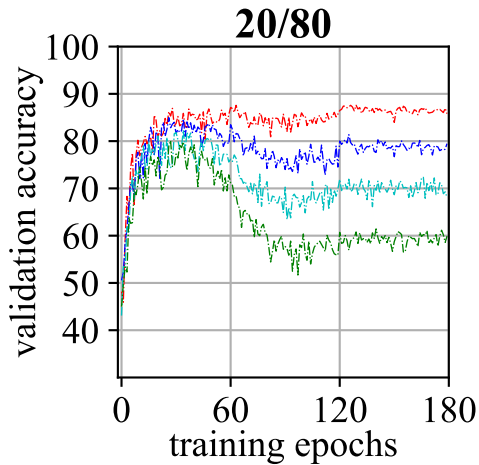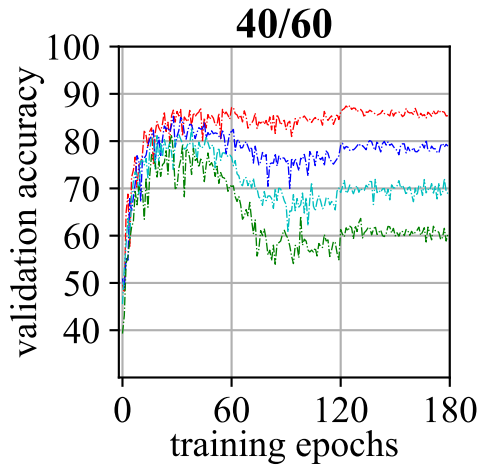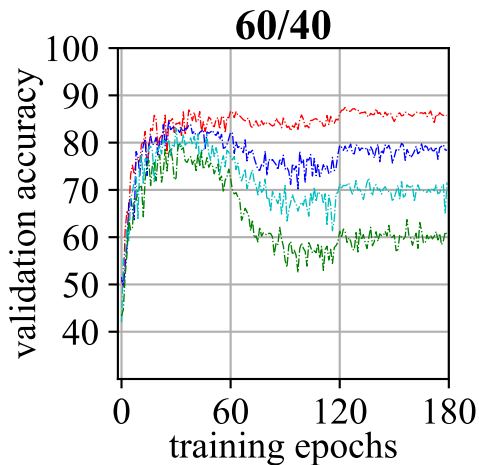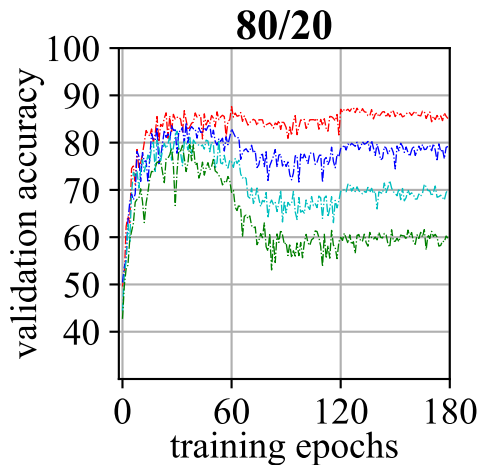

0.2      0.4      0.6      0.8

Supplement: supplementary_material [file attachment]

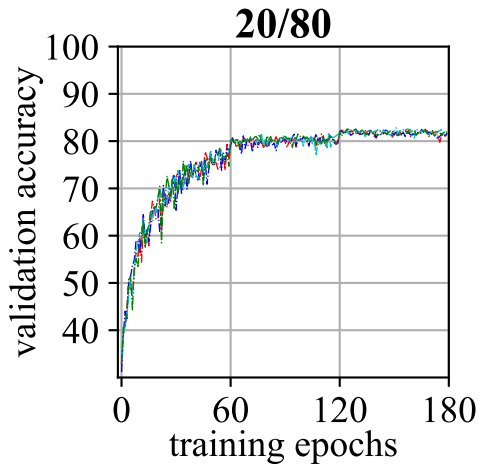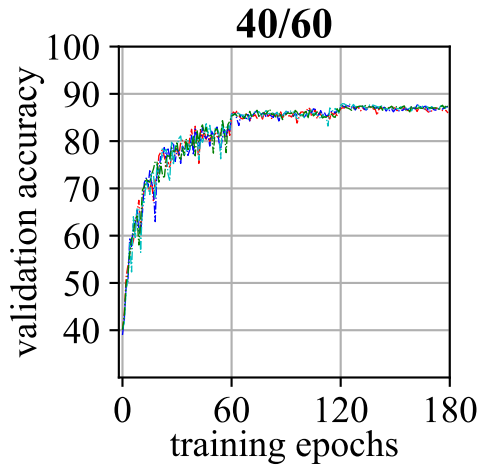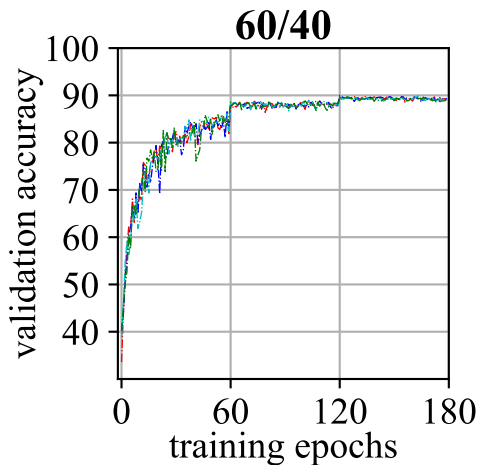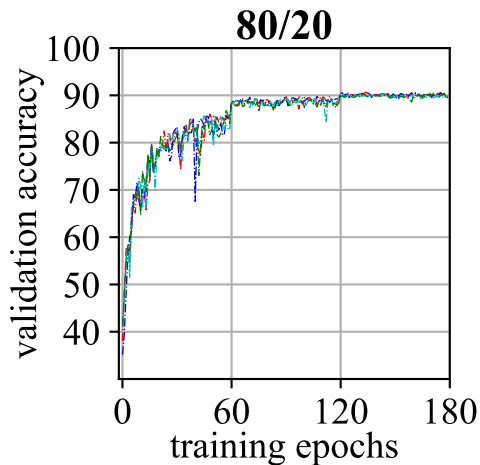

0.2      0.4      0.6      0.8

Supplement: supplementary_material [file attachment]

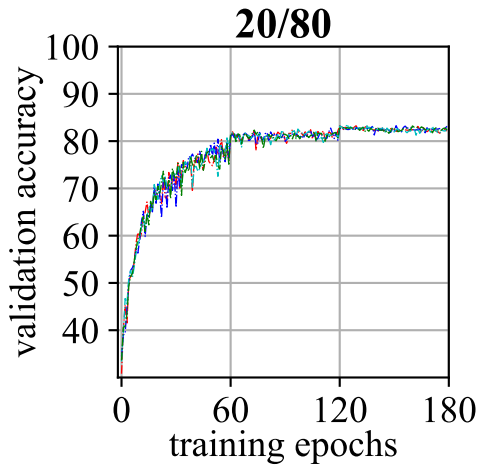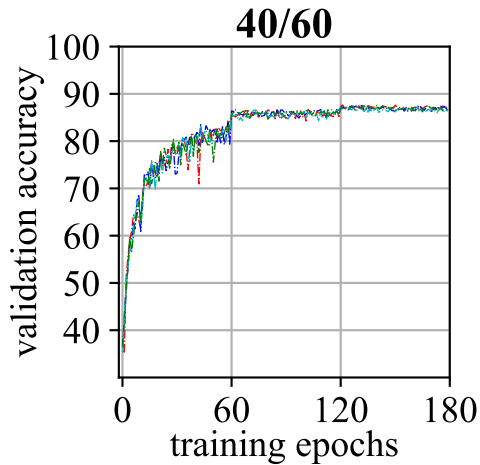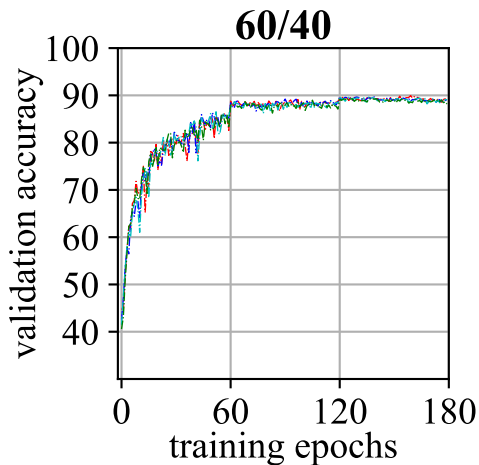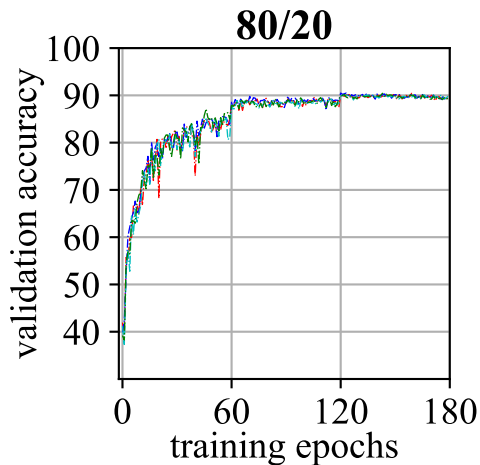

0.2      0.4      0.6      0.8

Supplement: supplementary_material [file attachment]
